# Supplementary material
Source: HighWire-hosted journal article supplement (https://bmjopen.bmj.com/content/6/6/e012677)
Supplement: inline-supplementary-material-1 [file inline-supplementary-material-1.pdf]

## Appendix 1: Questionnaire

1) Please rate how important you think the article is:

Not at all  
important  
o

o

o

o

o

o

o

o

o

Extremely  
important  
o

2) Please rate how interesting you think the article is:

Not at all  
interesting  
o

o

o

o

o

o

o

o

o

Extremely  
interesting  
o

3) Please rate how confident you are in the article's conclusions on the management of <condition X>?

Not at all  
confident  
o

o

o

o

o

o

o

o

o

Extremely  
confident  
o

4) Do you treat patients with <condition X>?

- ☐ Yes, I currently treat patients with <condition X>
- ☐ No, I do not currently treat patients with <condition X>, but have done in the past
- ☐ No, I do not treat patients with <condition X>

**[If No to Q4, skip to Q6]**

**Q5 (If Yes to Q4):**

5a) Does the article recommend practice that differs from your current practice?

- ☐ Yes
- ☐ No

**If Yes to Q5a**

5b) How likely are you to change your practice based on this article?

Not at all  
likely  
o

o

o

o

o

o

o

o

o

Extremely likely  
o

5c) Please briefly state your reason(s) for the rating you gave above:

---

---

---

6) Do you have any further comments?

---

---

---

---

**Thank you for your help with this survey**
